# Supplementary material for: Fabrication of dual anti-corrosive polyaniline microcapsules via Pickering emulsion for active corrosion protection of steel
Source: Royal Society of Chemistry journal article supplement (doi:10.1039/d2sm00062h), 2022-01-01
Supplement: d2sm00062h1.pdf [file d2sm00062h1.pdf]

## SUPPLEMENTARY DATA FOR:

### **Fabrication of dual anti-corrosive polyaniline microcapsules via Pickering emulsion for active corrosion protection of steel**

Weihaio Pan<sup>1#</sup>, Jiahao Dong<sup>1#</sup>, Taijiang Gui<sup>2#</sup>, Ren Liu<sup>\*,1</sup>, Xiaoya Liu<sup>1#</sup>, Jing Luo<sup>\*,1</sup>

*1 The Key Laboratory of Synthetic and Biological Colloids, Ministry of Education, School of Chemical and*

*Material Engineering, Jiangnan University, Lihu Street 1800, Wuxi 214122, China*

*2 Marine Chemical Research Institute, State Key Laboratory of Marine Coating, Qingdao, Shandong 266071,*

*China*

---

\* Corresponding author. Fax: 86-510-85917763; Tel: 86-510-85917763;

E-mail: liuren@jiangnan.edu.cn. E-mail: jingluo19801007@126.com.

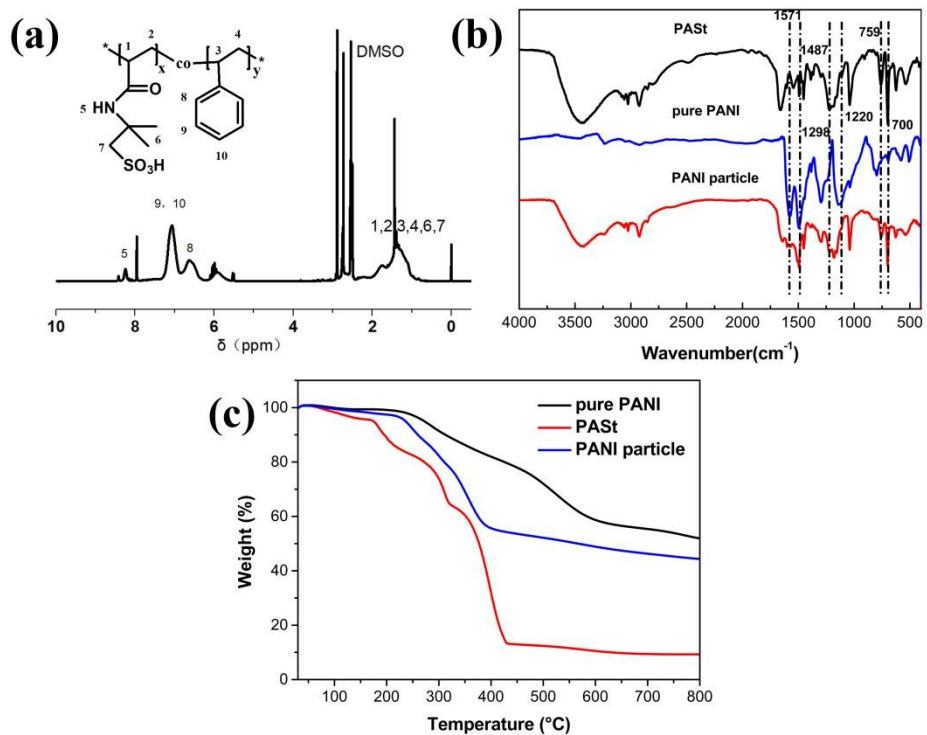

**Figure S1.** (a)  $^1\text{H}$  NMR spectrum of PAST copolymer. (b) FTIR spectra and (c) TGA curves of PAST copolymer, pure PANI and PANI particles.

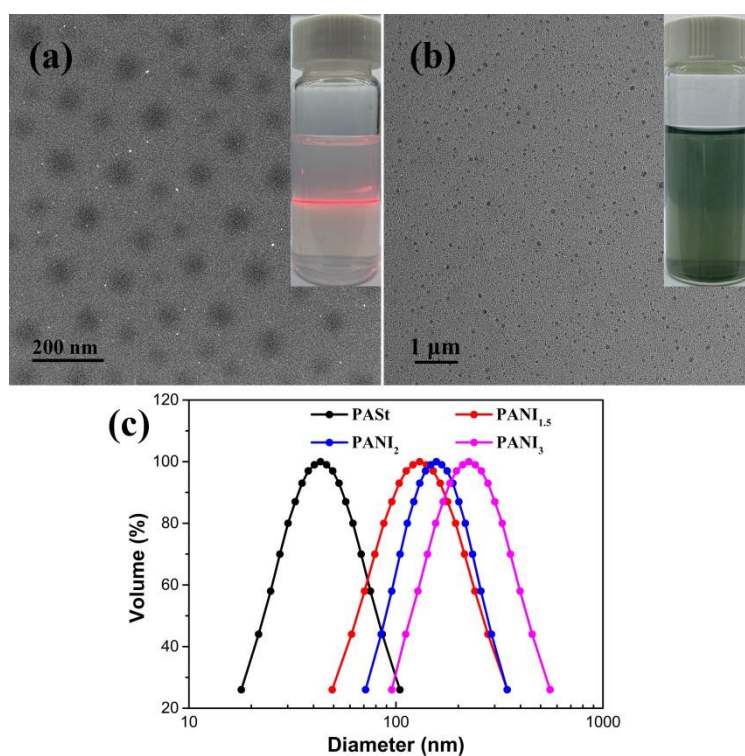

**Figure S2.** TEM images and digital photos of PAST micelle (a), PANI particles (b). Size distribution of PAST micelle and PANI particles (c).

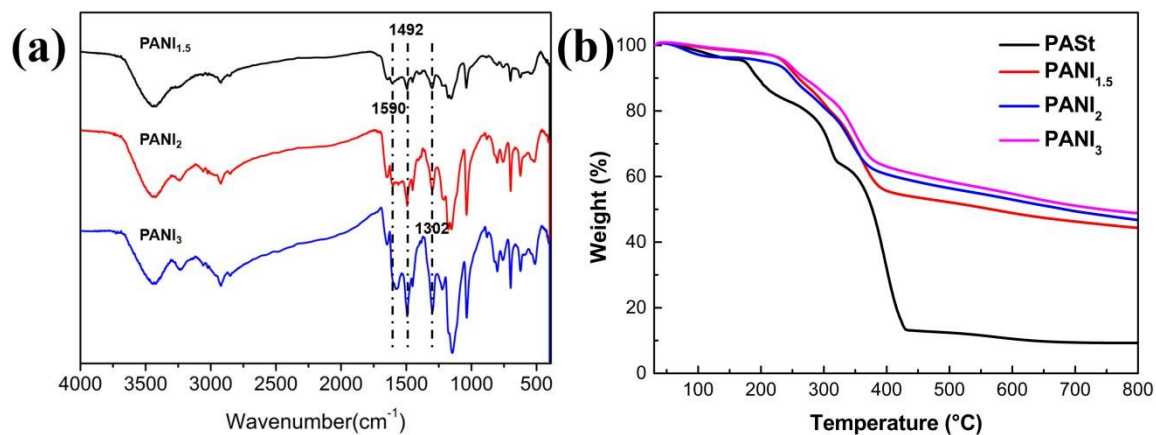

**Figure S3.** FTIR spectra (a) and TGA curves (b) of PANI particles.

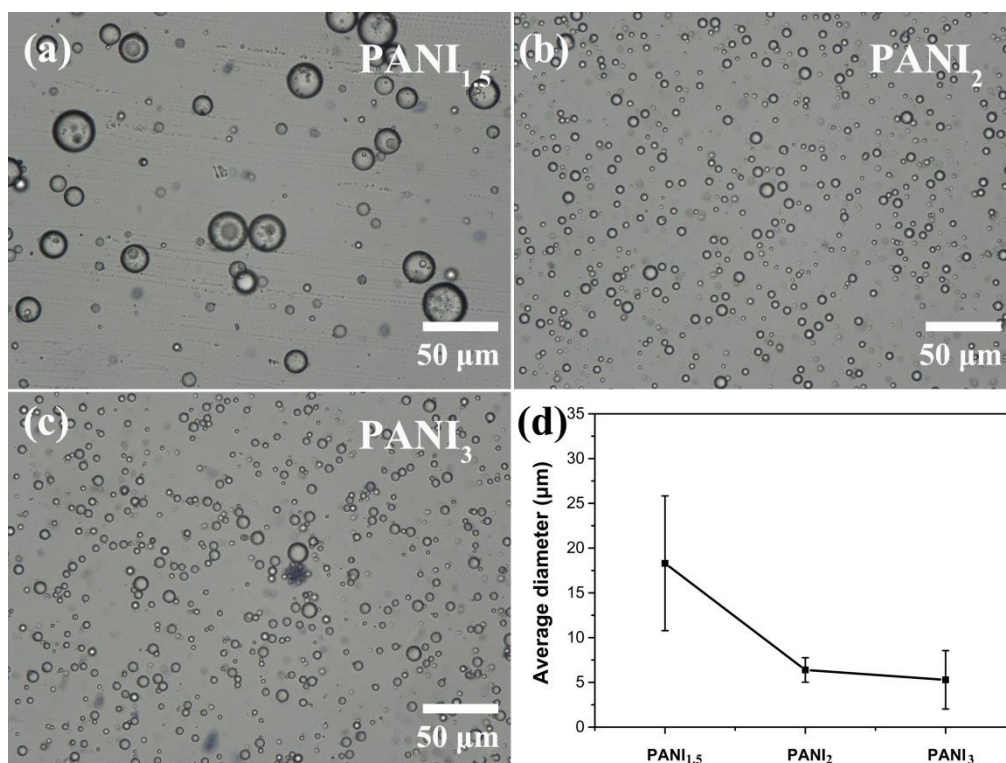

**Figure S4.** OM images of Pickering emulsion obtained with different PANI particles as Pickering emulsifiers. (a) PANI<sub>1.5</sub>, (b) PANI<sub>2</sub>, (c) PANI<sub>3</sub>, (d) the average droplet diameter of different PANI particles.

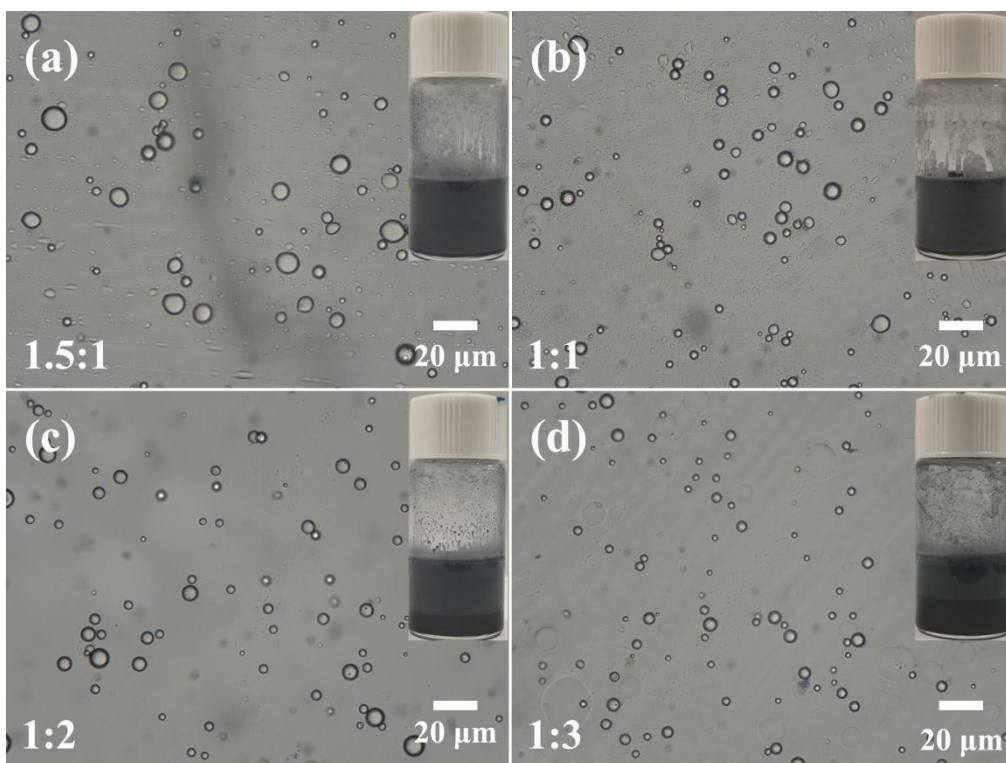

**Figure S5.** OM images of Pickering emulsion obtained with different oil-water ratios. (a) 1.5:1; (b) 1:1; (c) 1:2; (d) 1:3. (the concentration of the PANI emulsifier was 15 mg/mL)

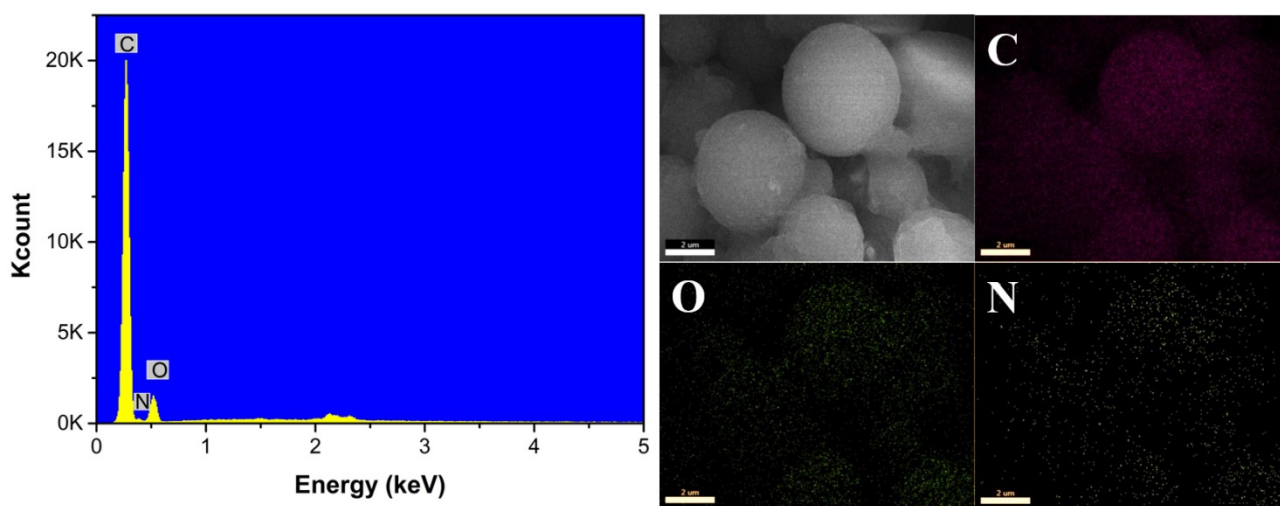

**Figure S6.** EDS spectrum and corresponding element distribution map of PANI microcapsules.
